# Supplementary material for: Renewable Hydrogen Production by Aqueous Phase Reforming of Pure/Refined Crude Glycerol over Ni/Al-Ca Catalysts
Source: MDPI journal article supplement (doi:10.3390/molecules28186695), 2023-09-19
Supplement: s1 [file s1]

# Renewable Hydrogen Production by Aqueous Phase Reforming of Pure/Refined Crude Glycerol over Ni/Al-Ca Catalysts

Raquel Raso, Eduardo Abad, Lucía García \*, Joaquín Ruiz, Miriam Oliva and Jesús Arauzo

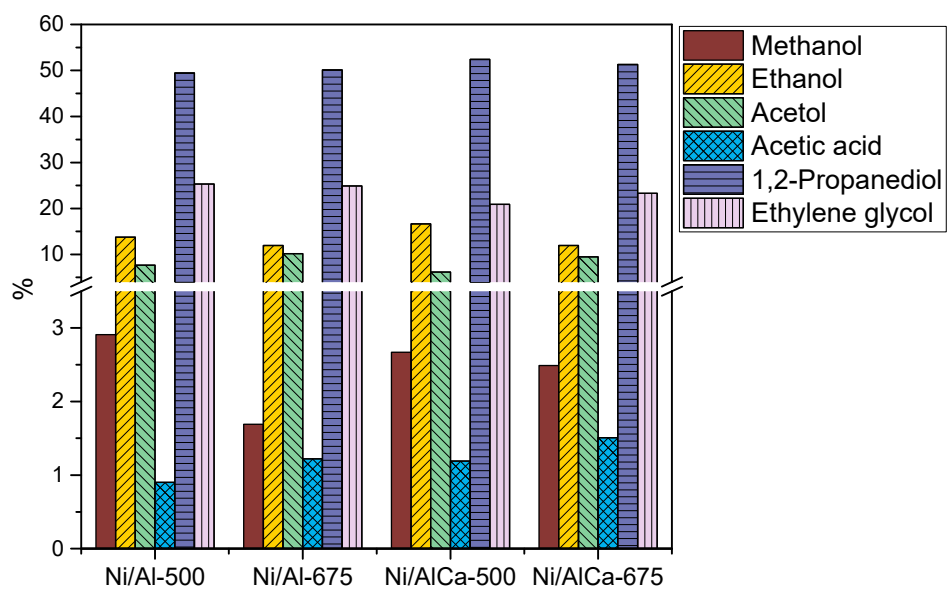

**Figure S1.** Carbon selectivity to liquid products of the catalysts during APR of pure glycerol.

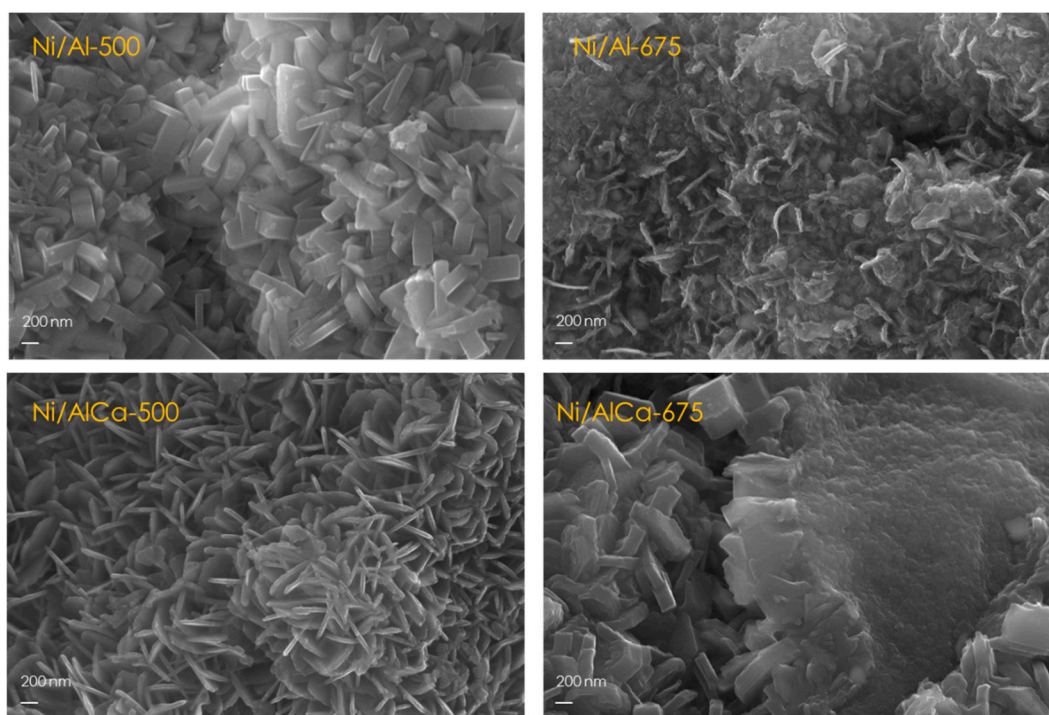

**Figure S2.** FESEM images of the used catalysts using pure glycerol as feed.

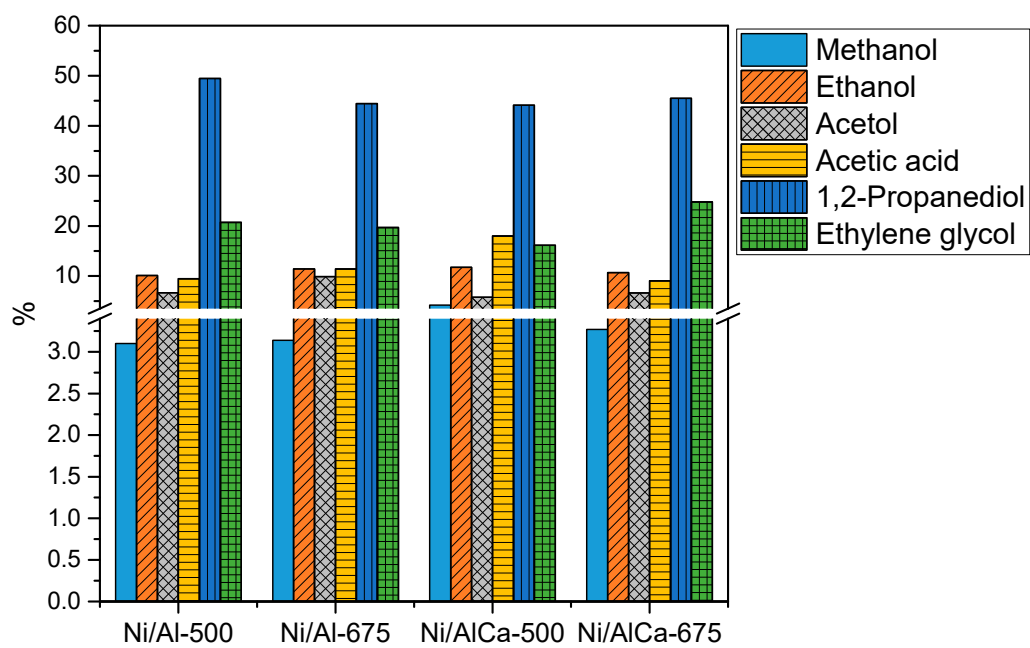

**Figure S3.** Carbon selectivity to liquid products of the catalysts during APR of refined crude glycerol.

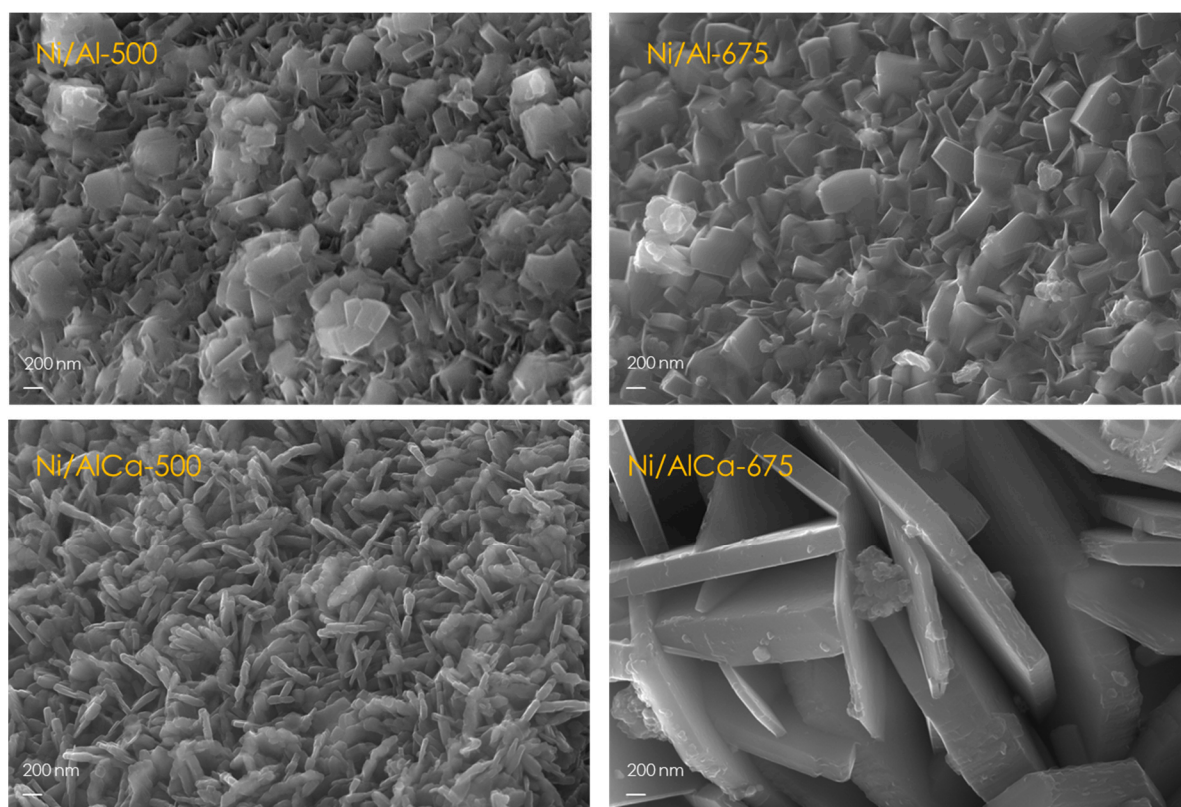

**Figure S4.** FESEM images of the used catalysts using refined crude glycerol as feed.
